# Supplementary material
Source: PubMed Central journal article supplement (PMC7042833)
Supplement: jamacardiol-5-420-s001.pdf [file jamacardiol-5-420-s001.pdf]

## Supplementary Online Content

Lim K, Ting SMS, Hamborg T, et al. Cardiovascular functional reserve before and after kidney transplant. *JAMA Cardiol*. Published online February 5, 2020. doi:10.1001/jamacardio.2019.5738

**eMethods.** Supplemental Methods

**eFigure 1.** Number of Patients Enrolled and Completed Study

**eFigure 2.** Changes in Echocardiographic Measures Before and After Kidney Transplantation (Adjusted)

**eTable 1.** Laboratory Measures at Baseline, 2-Months, and 12-Months Follow-up (Unadjusted)

**eTable 2.** Baseline Cardiovascular Characteristics

**eTable 3.** Baseline Characteristics of Patients Lost to Follow-up During the 12-Month Study Period

**eTable 4.** Cardiovascular Functional and Hemodynamic Measures

**This supplementary material has been provided by the authors to give readers additional information about their work.**

## **eMethods.** Supplemental Methods

### **Study Design**

Clinical and demographic data, body mass index (BMI) and smoking history (ever or never) were recorded. Ethnicity data was provided by the participants. This information was collected for baseline demographic data only. Assessment of co-morbidities included a history of (1) CVD (defined as non-fatal myocardial infarction, acute coronary syndrome requiring hospitalization, percutaneous coronary intervention, coronary artery bypass graft or stroke) or (2) diabetes (defined as use of oral hypoglycemic agent or insulin). Antihypertensive medication use was recorded.

Biochemical measures included highly sensitive-C-reactive protein (hs-CRP), albumin-corrected calcium, phosphate, intact parathyroid hormone (iPTH) and serum creatinine concentrations. Glomerular Filtration Rate was estimated by six-variable Modification of Diet in Renal Disease equation<sup>17</sup>.

### **CPET assessment**

CPET was conducted using an electronically braked, upright cycle ergometer incorporating individualized work rate and continuous 12-lead ECG recording. The equipment was calibrated prior to each assessment. Care was taken to ensure participants understood the maximal exercise test protocol and to brief against premature cessation of pedalling or incremental loading due to symptoms of lactic acidosis. Participants rested for 3 minutes followed by 3 minutes of unloaded pedalling prior to workload increments, continuing until symptom-limited volitional fatigue. Continuous breath-by-breath gas exchange analysis (VIASYS, MasterScreen CPX®, Hoechst, Germany) was performed. The  $VO_2$  at the point of anaerobic threshold ( $VO_{2AT}$ ) was determined by the V-slope method in conjunction with analyses of the ventilatory equivalents and end-tidal gas tension plots<sup>20</sup>.  $VO_{2max}$  was measured as the highest  $VO_2$  achieved during the final 20-second averaging of peak exercise. An experienced blinded investigator carried out all exercise testing. Anaerobic threshold and maximal ventilator reserve were indexed to body weight.

## **Echocardiography**

Two-dimensional, Doppler and tissue Doppler transthoracic echocardiography were performed using Vivid 7 (GE Healthcare, Horten, Norway). Calculations included LV mass, LV volumes, left atrial (LA) volume and LVEF according to quantitative biplane Simpson's method. Mass and volume measures were indexed to body surface area. Sequential tissue Doppler imaging of the lateral and septal annular sites were obtained from the apical 4-chamber view. The ratio of early transmitral flow velocity to averaged annular (septal and lateral) mitral velocity ( $E/\text{mean } e'$ ) was taken as a non-invasive estimate of LV filling pressure. All measurements were undertaken according to the American Society of Echocardiography<sup>21</sup> and analyzed offline (EchoPac, GE Healthcare) by a blinded investigator. Brachial blood pressure was measured following 10 minutes of supine rest by oscillometric sphygmomanometer (Omron 705IT, Omron Healthcare, Kyoto, Japan).

## SUPPLEMENTAL FIGURES

**Supplemental eFigure 1:** Number of patients enrolled and completed study

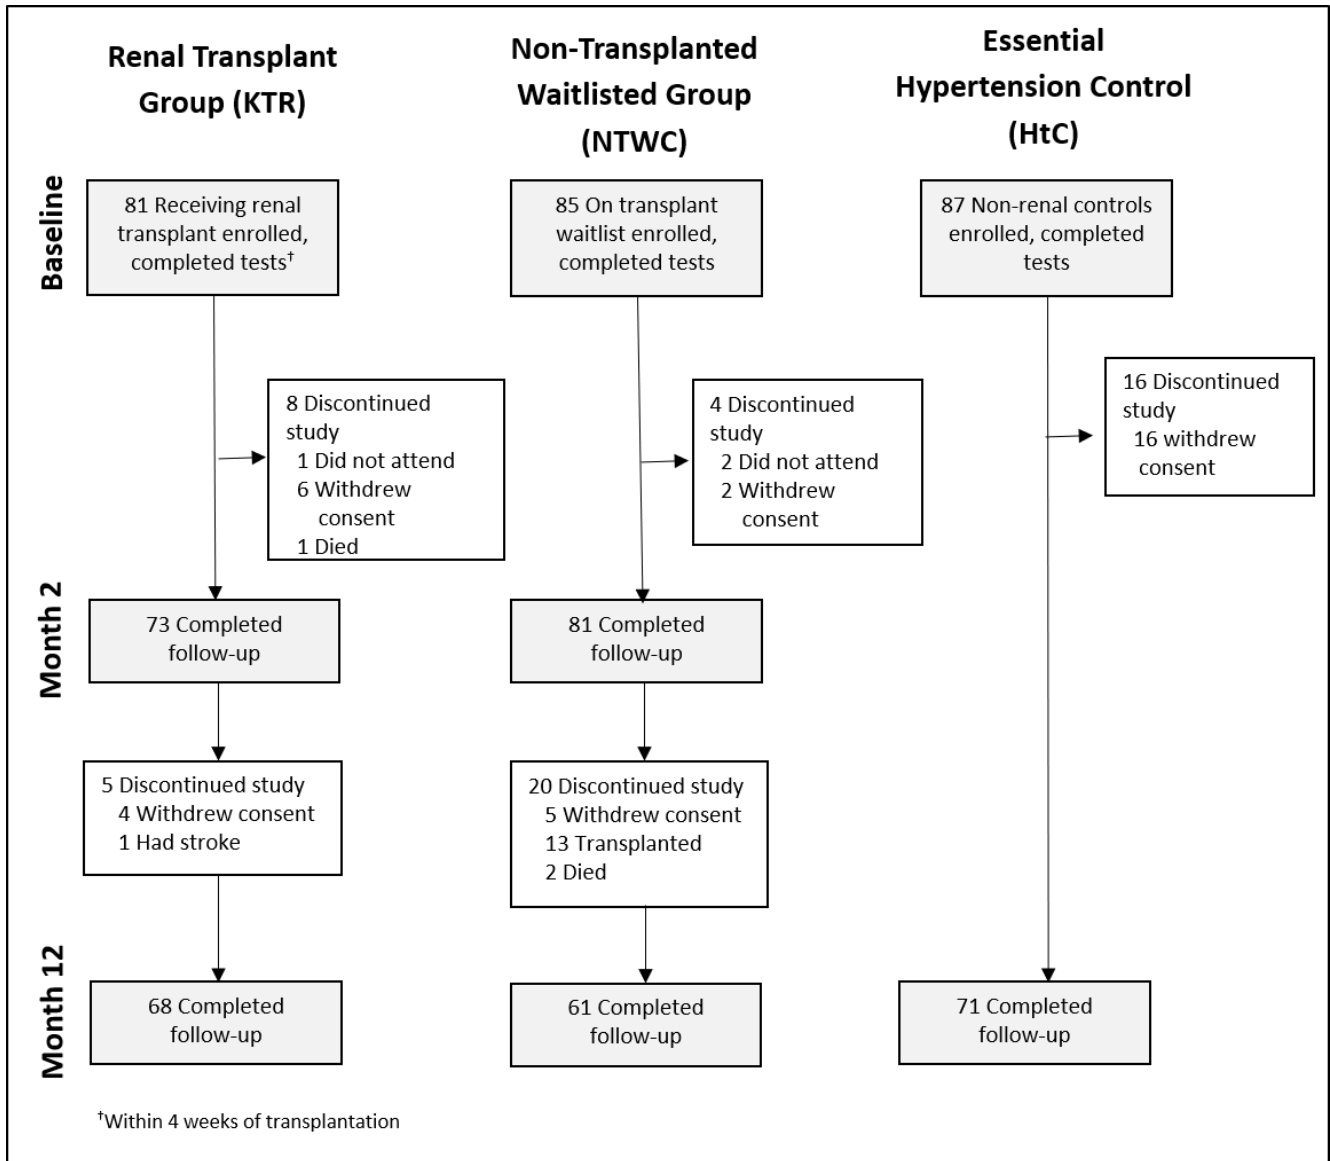

**Supplemental eFigure 2: Changes in echocardiographic measures before and after kidney transplantation (adjusted).**

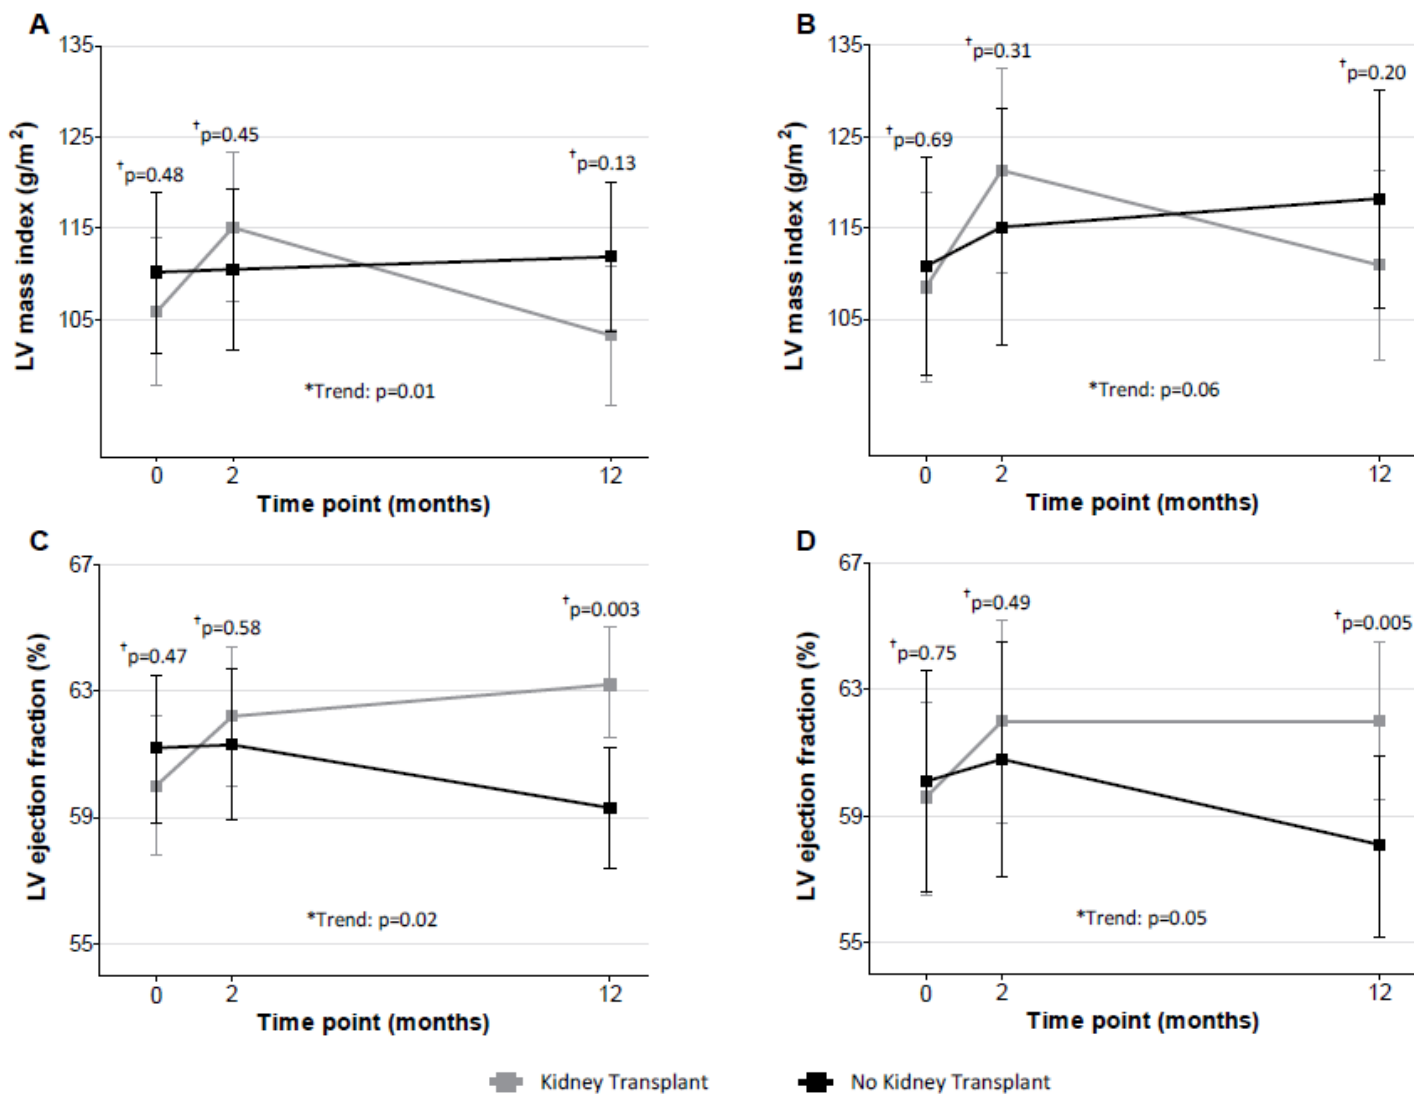

Changes in LV mass index and LV ejection fraction over time at baseline (before transplant), 2-months and 12-months follow-up (A, C, unadjusted comparison; B, D, adjusted for age, BMI, gender, smoking, diabetes, cardiovascular disease, duration of antihypertensive therapy, beta-blocker, hemoglobin and dialysis duration. †p-value for comparison between 2 groups at each respective time point. \*p-value for comparison between 2 groups for changes over time.

## SUPPLEMENTAL RESULTS

**Supplemental eTable 1: Laboratory measures at baseline, 2-months and 12-months follow-up (unadjusted).**

| Variables                       | Patient Group        | Time point  |             |             | p-value <sup>1</sup> |
|---------------------------------|----------------------|-------------|-------------|-------------|----------------------|
|                                 |                      | Baseline    | Month 2     | Month 12    |                      |
| eGFR, ml/min/1.73m <sup>2</sup> | Transplanted         | 9.6 ± 4.1   | 55.3 ± 17.0 | 59.1 ± 18.4 | <0.001               |
|                                 | Non-transplanted     | 8.9 ± 4.8   | 9.2 ± 5.0   | 9.1 ± 4.3   |                      |
|                                 | Control              | 92.5 ± 15.0 | -           | 92.2 ± 18.2 |                      |
|                                 | p-value <sup>2</sup> | <0.001      | <0.001      | <0.001      |                      |
| Calcium, mmol/L                 | Transplanted         | 2.2 ± 0.2   | 2.3 ± 0.2   | 2.3 ± 0.2   | 0.10                 |
|                                 | Non-transplanted     | 2.3 ± 0.2   | 2.2 ± 0.2   | 2.3 ± 0.2   |                      |
|                                 | Control              | 2.2 ± 0.1   | -           | 2.2 ± 0.1   |                      |
|                                 | p-value <sup>2</sup> | 0.47        | 0.63        | 0.05        |                      |
| Phosphate, mmol/L               | Transplanted         | 1.7 ± 0.5   | 0.9 ± 0.2   | 0.9 ± 0.2   | <0.001               |
|                                 | Non-transplanted     | 1.5 ± 0.4   | 1.5 ± 0.4   | 1.5 ± 0.4   |                      |
|                                 | Control              | 1.1 ± 0.3   | -           | 1.1 ± 0.2   |                      |
|                                 | p-value <sup>2</sup> | <0.001      | <0.001      | <0.001      |                      |
| *iPTH, pmol/l                   | Transplanted         | 3.0 ± 1.1   | 2.1 ± 0.6   | 2.0 ± 0.6   | <0.001               |
|                                 | Non-transplanted     | 3.0 ± 1.2   | 3.1 ± 1.2   | 3.1 ± 1.0   |                      |
|                                 | Control              | 1.2 ± 0.4   | -           | 1.3 ± 0.3   |                      |
|                                 | p-value <sup>2</sup> | <0.001      | <0.001      | <0.001      |                      |
| *hsCRP, mg/l                    | Transplanted         | 0.9 ± 1.3   | 0.3 ± 1.3   | 0.7 ± 1.2   | 0.07                 |
|                                 | Non-transplanted     | 1.2 ± 1.3   | 1.2 ± 1.3   | 1.3 ± 1.3   |                      |
|                                 | Control              | 0.4 ± 1.0   | -           | 0.4 ± 1.0   |                      |
|                                 | p-value <sup>2</sup> | <0.001      | <0.001      | <0.001      |                      |
| Hemoglobin, g/dl                | Transplanted         | 11.8 ± 1.4  | 11.9 ± 1.5  | 13.2 ± 1.5  | <0.001               |
|                                 | Non-transplanted     | 11.7 ± 1.4  | 11.5 ± 1.2  | 11.2 ± 1.4  |                      |
|                                 | Control              | 14.2 ± 1.2  | -           | 14.2 ± 1.1  |                      |
|                                 | p-value <sup>2</sup> | <0.001      | 0.08        | <0.001      |                      |

Data are presented as mean ± standard deviation. \*Log-transformed prior to analysis. <sup>1</sup>Comparison of (time x group) interaction between the two renal groups using repeated measures ANOVA. <sup>2</sup>Comparison between all available groups at each respective time point

**Supplemental eTable 2: Baseline cardiovascular characteristics.**

I) Functional cardiovascular parameters as assessed by cardiopulmonary testing (CPET).

| Variables                                                  | Advanced CKD       |                         |                                    | Non-CKD Control (HtC) | p-value <sup>2</sup> (3-group comparison) |
|------------------------------------------------------------|--------------------|-------------------------|------------------------------------|-----------------------|-------------------------------------------|
|                                                            | Transplanted (KTR) | Non-transplanted (NTWC) | p-value <sup>1</sup> (KTR vs NTWC) |                       |                                           |
| VO <sub>2</sub> max, ml min <sup>-1</sup> kg <sup>-1</sup> | 20.7 ± 5.8         | 18.9 ± 4.7              | 0.03                               | 24.9 ± 7.1            | <0.001                                    |
| VO <sub>2</sub> max absolute, ml min <sup>-1</sup>         | 1495.9 ± 553.1     | 1427.3 ± 391.6          | 0.42                               | 1979.0 ± 725.2        | <0.001                                    |
| VO <sub>2</sub> AT, ml min <sup>-1</sup> kg <sup>-1</sup>  | 11.8 ± 2.3         | 11.4 ± 2.3              | 0.23                               | 14.8 ± 3.8            | <0.001                                    |
| VO <sub>2</sub> AT absolute, ml min <sup>-1</sup>          | 846.4 ± 235.1      | 859.0 ± 172.9           | 0.51                               | 1168.5 ± 400.5        | <0.001                                    |
| Maximal work load, Watt                                    | 115.3 ± 50.7       | 105.2 ± 36.7            | 0.09                               | 156.4 ± 61.8          | <0.001                                    |
| Endurance time, min                                        | 10.3 [9.0, 11.7]   | 10.3 [8.9, 11.7]        | 0.96                               | 11.7 [10.5, 12.8]     | <0.001                                    |
| O <sub>2</sub> pulse, ml min <sup>-1</sup>                 | 10.1 [8.4, 12.9]   | 11.1 [8.8, 13.5]        | 0.63                               | 11.7 [9.4, 14.7]      | 0.009                                     |
| HRmax, beat min <sup>-1</sup>                              | 139.0 ± 22.9       | 132.1 ± 26.9            | 0.08                               | 155.1 ± 18.5          | <0.001                                    |
| HRmax, %predicted                                          | 78.5 ± 12.0        | 77.5 ± 15.5             | 0.65                               | 93.0 ± 9.8            | <0.001                                    |
| RER at peak exercise                                       | 1.2 ± 0.1          | 1.3 ± 0.1               | 0.02                               | 1.2 ± 0.1             | <0.001                                    |
| RER at VO <sub>2</sub> AT                                  | 0.9 ± 0.1          | 0.9 ± 0.1               | 0.05                               | 0.9 ± 0.1             | <0.001                                    |

II) Echocardiographic measures.

|                                    | Advanced CKD       |                         |                                    | Non-CKD Control (HtC) | p-value <sup>2</sup> (3-group comparison) |
|------------------------------------|--------------------|-------------------------|------------------------------------|-----------------------|-------------------------------------------|
|                                    | Transplanted (KTR) | Non-transplanted (NTWC) | p-value <sup>1</sup> (KTR vs NTWC) |                       |                                           |
| LV mass index, g/m <sup>2</sup>    | 104.9 ± 36.1       | 113.8 ± 37.7            | 0.07                               | 87.8 ± 16.9           | <0.001                                    |
| LV geometry                        |                    |                         | 0.67                               |                       | <0.001                                    |
| Normal geometry                    | 14 (17.3)          | 17 (20.0)               | -                                  | 27 (32.5)             | -                                         |
| Concentric remodelling             | 32 (39.5)          | 27 (31.8)               | -                                  | 41 (49.4)             | -                                         |
| Concentric hypertrophy             | 24 (29.6)          | 31 (36.5)               | -                                  | 7 (8.4)               | -                                         |
| Eccentric hypertrophy              | 11 (13.6)          | 10 (11.8)               | -                                  | 0 (9.6)               | -                                         |
| LV diameter, cm                    | 4.6 (0.7)          | 4.7 (0.7)               | 0.35                               | 4.5 (0.5)             | 0.08                                      |
| LVEDVI, ml/m <sup>2</sup>          | 48.2 ± 16.7        | 51.0 ± 17.7             | 0.30                               | 44.4 ± 10.2           | 0.02                                      |
| LVESVI, ml/m <sup>2</sup>          | 19.8 ± 8.6         | 20.6 ± 10.9             | 0.55                               | 14.9 ± 4.6            | <0.001                                    |
| LV ejection fraction, %            | 60.1 ± 8.6         | 61.4 ± 8.9              | 0.43                               | 66.1 ± 5.9            | <0.001                                    |
| *E/mean e'                         | 2.0 [1.8, 2.3]     | 2.1 [1.9, 2.3]          | 0.34                               | 2.1 [1.9, 2.2]        | 0.23                                      |
| LA diameter, cm                    | 3.5 ± 0.7          | 3.7 ± 0.8               | 0.03                               | 3.7 ± 0.5             | 0.10                                      |
| LA volume index, ml/m <sup>2</sup> | 25.8 [19.1, 30.5]  | 25.9 [18.9, 37.1]       | 0.17                               | 25.4 [19.9, 28.7]     | 0.10                                      |

Data are presented as mean ± standard deviation, median [interquartile range], and n(%) for LV geometry. \*Log-transformed prior to analysis.

I) VO<sub>2</sub>max, oxygen consumption at peak exercise; VO<sub>2</sub>AT, oxygen consumption at the point of anaerobic threshold; HR, heart rate at peak exercise; RER, respiratory exchange ratio of CO<sub>2</sub> production to O<sub>2</sub> consumption. II) LV, left ventricular; LVEDVI, LV end-diastolic volume index; LVESVI, LV end-systolic volume index; LA, left atrium; E/mean e', the ratio of peak early transmitral ventricular filling velocity to averaged septal and lateral annular mitral velocity; LA, left atrium. P-value<sup>1</sup>: by independent-samples t-test or Kruskal-Wallis test for 2-group comparison between KTR and NTWC; P-value<sup>2</sup>: ANOVA, Kruskal-Wallis test or χ<sup>2</sup> (categorical variables) for 3-group comparison.





**Supplemental eTable 3: Baseline characteristics of patients lost to follow-up during the 12-month study period**

**A) Demographic and laboratory data**

| Variables                             | Advanced CKD         |                         | Non-CKD Control (HtC) | p-value |
|---------------------------------------|----------------------|-------------------------|-----------------------|---------|
|                                       | Transplanted (KTR)   | Non-transplanted (NTWC) |                       |         |
| <b>Number of subjects</b>             | 13                   | 24                      | 16                    |         |
| <b>Male, n (%)</b>                    | 4 (30.7)             | 11 (45.8)               | 6 (37.5)              | 0.66    |
| <b>Age, years</b>                     | 41.1 ± 14.6          | 48.1 ± 14.3             | 51.6 ± 9.1            | 0.10    |
| <b>BMI, kg/m<sup>2</sup></b>          | 25.0 ± 3.7           | 26.5 ± 5.4              | 28.3 ± 4.2            | 0.16    |
| <b>Hypertension, n (%)</b>            | 10 (76.9)            | 20 (83.3)               | 16 (100)              | 0.15    |
| <b>Smoking (Ever), n (%)</b>          | 5 (38.5)             | 12 (50.0)               | 8 (50.0)              | 0.77    |
| <b>Diabetes, n (%)</b>                | 2 (15.4)             | 3 (12.5)                | 0 (0)                 | -       |
| <b>Cardiovascular disease, n (%)</b>  | 1 (7.7)              | 2 (8.3)                 | 0 (0)                 | -       |
| <b>Dialysis status, n (%)</b>         |                      |                         |                       | -       |
| <b>Predialysis</b>                    | 3 (23.1)             | 4 (16.7)                | -                     | -       |
| <b>Hemodialysis</b>                   | 9 (69.2)             | 17 (70.8)               | -                     | -       |
| <b>Peritoneal dialysis</b>            | 1 (7.7)              | 3 (12.5)                | -                     | -       |
| <b>Dialysis duration, months</b>      | 41.9 ± 35.2          | 37.5 ± 40.3             | -                     | -       |
| <b>Laboratory</b>                     |                      |                         |                       | -       |
| <b>Creatinine, µmol/l</b>             | 485.0 [460.0, 768.0] | 674.0 [428.5, 754.0]    | 67.0 [59.0, 84.0]     | <0.001  |
| <b>eGFR, ml/min/1.73m<sup>2</sup></b> | 9.9 ± 4.5            | 9.0 ± 4.9               | 91.6 ± 10.9           | <0.001  |
| <b>Albumin, g/l</b>                   | 44.0 [41.0, 47.0]    | 44.0 [41.0, 46.5]       | 47.0 [46.0, 47.0]     | 0.03    |
| <sup>*</sup> <b>hsCRP, mg/l</b>       | 1.3 ± 0.9            | 1.3 ± 1.4               | 0.2 ± 0.9             | 0.01    |
| <b>Hemoglobin, g/dl</b>               | 11.9 [11.2, 13.2]    | 11.9 [10.8, 12.7]       | 13.9 [12.8, 14.6]     | <0.001  |

BMI, body mass index; eGFR, estimated glomerular filtration rate; hsCRP, highly sensitive C-reactive protein. Data are presented as mean ± standard deviation, median [interquartile range] or frequencies (%). \*Log-transformed prior to analysis. P-value by ANOVA, Kruskal-Wallis or  $\chi^2$ -test for 3-group comparison.

## B) Cardiovascular parameters as assessed by CPET and echocardiography

| Variables                                                  | Advanced CKD       |                         |                                    | Non-CKD Control (HtC) | p-value <sup>2</sup> (3-group comparison) |
|------------------------------------------------------------|--------------------|-------------------------|------------------------------------|-----------------------|-------------------------------------------|
|                                                            | Transplanted (KTR) | Non-transplanted (NTWC) | p-value <sup>1</sup> (KTR vs NTWC) |                       |                                           |
| VO <sub>2</sub> max, ml min <sup>-1</sup> kg <sup>-1</sup> | 18.3 ± 5.5         | 18.4 ± 4.8              | 0.99                               | 22.1 ± 5.0            | 0.07                                      |
| VO <sub>2</sub> max absolute, ml min <sup>-1</sup>         | 1245.6 ± 416.1     | 1339.7 ± 420.1          | 0.52                               | 1724.4 ± 561.6        | 0.02                                      |
| VO <sub>2</sub> AT, ml min <sup>-1</sup> kg <sup>-1</sup>  | 11.0 ± 2.6         | 11.3 ± 2.7              | 0.73                               | 12.7 ± 2.2            | 0.16                                      |
| VO <sub>2</sub> AT absolute, ml min <sup>-1</sup>          | 751.8 ± 222.0      | 815.3 ± 181.8           | 0.36                               | 988.5 ± 271.9         | 0.02                                      |
| RER at peak exercise                                       | 1.2 ± 0.1          | 1.3 ± 0.1               | 0.06                               | 1.2 ± 0.1             | 0.05                                      |
| LV mass index, g/m <sup>2</sup>                            | 91.2 ± 47.2        | 115.9 ± 44.9            | 0.13                               | 92.3 ± 17.0           | 0.12                                      |
| LV ejection fraction, %                                    | 61.5 ± 7.6         | 61.6 ± 9.8              | 0.98                               | 64.7 ± 5.3            | 0.51                                      |
| *E/mean e'                                                 | 2.1 ± 0.3          | 2.2 ± 0.3               | 0.29                               | 2.0 ± 0.2             | 0.18                                      |

Data are presented as mean ± standard deviation. \*Log-transformed prior to analysis. VO<sub>2</sub>max, oxygen consumption at peak exercise; VO<sub>2</sub>AT, oxygen consumption at the point of anaerobic threshold; RER, respiratory exchange ratio of CO<sub>2</sub> production to O<sub>2</sub> consumption. LV, left ventricular; E/mean e', the ratio of peak early transmitral ventricular filling velocity to averaged septal and lateral annular mitral velocity. P-value<sup>1</sup>: by independent-samples t-test for 2-group comparison between KTR and NTWC; P-value<sup>2</sup>: ANOVA for 3-group comparison.

**Supplemental eTable 4: Cardiovascular functional and hemodynamic measures**

| Variables                         | Patient Group        | Time point   |              |              | p-value <sup>1</sup> |
|-----------------------------------|----------------------|--------------|--------------|--------------|----------------------|
|                                   |                      | Baseline     | Month 2      | Month 12     |                      |
| Cardiovascular functional changes |                      |              |              |              |                      |
| HRmax, beat min <sup>-1</sup>     | Transplanted         | 139.0 ± 22.9 | 142.8 ± 23.4 | 140.5 ± 25.8 | 0.25                 |
|                                   | Non-transplanted     | 132.1 ± 26.9 | 130.8 ± 24.0 | 124.4 ± 20.9 |                      |
|                                   | Control              | 155.1 ± 18.5 | -            | 152.3 ± 19.3 |                      |
|                                   | p-value <sup>2</sup> | <0.001       | 0.002        | <0.001       |                      |
| HRmax, % predicted                | Transplanted         | 78.5 ± 12.0  | 80.5 ± 11.9  | 79.8 ± 12.8  | 0.48                 |
|                                   | Non-transplanted     | 77.5 ± 15.5  | 77.9 ± 15.7  | 74.0 ± 12.0  |                      |
|                                   | Control              | 93.0 ± 9.8   | -            | 92.3 ± 10.6  |                      |
|                                   | p-value <sup>2</sup> | <0.001       | 0.26         | <0.001       |                      |
| RER at peak exercise              | Transplanted         | 1.2 ± 0.1    | 1.3 ± 0.1    | 1.2 ± 0.1    | 0.15                 |
|                                   | Non-transplanted     | 1.3 ± 0.1    | 1.3 ± 0.1    | 1.3 ± 0.1    |                      |
|                                   | Control              | 1.2 ± 0.1    | -            | 1.2 ± 0.1    |                      |
|                                   | p-value <sup>2</sup> | 0.04         | 0.49         | 0.003        |                      |
| Resting hemodynamic measures      |                      |              |              |              |                      |
| Systolic BP, mmHg                 | Transplanted         | 136.2 ± 20.2 | 138.8 ± 14.8 | 137.4 ± 14.8 | 0.26                 |
|                                   | Non-transplanted     | 133.1 ± 20.8 | 130.5 ± 21.2 | 135.1 ± 19.0 |                      |
|                                   | Control              | 141.5 ± 13.2 | -            | 138.8 ± 13.1 |                      |
|                                   | p-value <sup>2</sup> | 0.01         | 0.01         | 0.40         |                      |
| Diastolic BP, mmHg                | Transplanted         | 81.8 ± 11.7  | 80.8 ± 11.0  | 81.4 ± 10.5  | 0.74                 |
|                                   | Non-transplanted     | 78.7 ± 12.3  | 78.4 ± 12.5  | 80.7 ± 12.8  |                      |
|                                   | Control              | 85.7 ± 9.9   | -            | 82.8 ± 8.5   |                      |
|                                   | p-value <sup>2</sup> | <0.001       | 0.22         | 0.49         |                      |
| Mean arterial pressure, mmHg      | Transplanted         | 100.0 ± 12.9 | 100.1 ± 9.6  | 100.0 ± 9.6  | 0.56                 |
|                                   | Non-transplanted     | 96.8 ± 13.8  | 95.8 ± 14.0  | 98.8 ± 13.5  |                      |
|                                   | Control              | 104.3 ± 9.5  | -            | 101.5 ± 8.2  |                      |
|                                   | p-value <sup>2</sup> | <0.001       | 0.03         | 0.34         |                      |

Data are presented as mean with standard deviation. \*Log-transformed prior to analysis. <sup>1</sup>Comparison of time x group interaction between the two renal groups using ANOVA. <sup>2</sup>Comparison between all available groups at each respective time point
